# Supplementary material for: Physician and Nurse Well-Being and Preferred Interventions to Address Burnout in Hospital Practice: Factors Associated With Turnover, Outcomes, and Patient Safety
Source: PubMed Central journal article supplement (PMC10329209; doi:10.1001/jamahealthforum.2023.1809), 2023-07-07
Supplement: jamahealthforum-e231809-s001.pdf [file jamahealthforum-e231809-s001.pdf]

## Supplemental Online Content

Aiken LH, Lasater KB, Sloane DM, et al; US Clinician Wellbeing Study Consortium. Physician and nurse well-being and preferred interventions to address burnout in hospital practice: factors associated with turnover, outcomes, and patient safety. *JAMA Health Forum*. 2023;4(7):e231809. doi:10.1001/jamahealthforum.2023.1809

**eTable 1.** Coefficients from Ordinary Least Square Regression Models Estimating the Differences in the Percentages of Clinicians with Various Outcomes (Burnout, Job Satisfaction, Intent to Leave) in Hospitals at the 75th vs. 25th Percentiles of Resources, Management and Patient Safety

**eTable 2.** Sensitivity Analysis Comparing Nurse Coefficients from 53 vs 60 Study Hospitals using Ordinary Least Square Regression Models to Estimate the Differences in the Percentages of Clinicians with Various Outcomes (Burnout, Job Satisfaction, Intent to Leave) in Hospitals at the 75th vs. 25th Percentiles of Resources, Management and Patient Safety

**eTable 3.** Characteristics of Magnet and Non-Magnet Hospitals

This supplemental material has been provided by the authors to give readers additional information about their work.

**eTable 1. Coefficients from Ordinary Least Square Regression Models Estimating the Differences in the Percentages of Clinicians with Various Outcomes (Burnout, Job Satisfaction, Intent to Leave) in Hospitals at the 75th vs. 25<sup>th</sup> Percentiles of Resources, Management and Patient Safety**

| Resources, Management and Patient Safety                                                                         | Clinician Outcomes     |                     |                      |                       |                        |                        |
|------------------------------------------------------------------------------------------------------------------|------------------------|---------------------|----------------------|-----------------------|------------------------|------------------------|
|                                                                                                                  | Physician Coefficients |                     |                      | Nurse Coefficients    |                        |                        |
|                                                                                                                  | Burnout                | Job Dissatisfaction | Intent to Leave      | Burnout               | Job Dissatisfaction    | Intent to Leave        |
| Not enough nurses to care for patients<br>(Physician IQR = 16.8% – 36.8%; RN IQR = 40.6% – 67.9%)                | 3.7*<br>[0.3-7.1]      | 3.9*<br>[0.9-6.9]   | 4.4**<br>[1.4-7.4]   | 12.2***<br>[9.7-14.8] | 12.2***<br>[10.0-14.4] | 15.6***<br>[12.8-18.4] |
| My control over my workload is poor or marginal<br>(Physician IQR = 23.5% – 40.6%; RN IQR = 29.7% – 42.2%)       | 8.5***<br>[5.0-11.9]   | 4.6*<br>[1.1-8.2]   | 6.9***<br>[3.6-10.2] | 9.8***<br>[7.5-12.0]  | 10.3***<br>[8.6-12.1]  | 13.0***<br>[10.8-15.3] |
| Not confident management will act to resolve problems<br>(Physician IQR = 33.3% – 51.7%; RN IQR = 40.2% – 53.9%) | 6.4***<br>[3.5-9.3]    | 4.7***<br>[2.0-7.4] | 4.3**<br>[1.5-7.1]   | 9.0***<br>[7.1-10.9]  | 9.2***<br>[7.6-10.7]   | 10.7***<br>[8.3-13.0]  |
| Work environment is poor or fair<br>(Physician IQR = 13.5% – 26.4%; RN IQR = 24.8% – 40.8%)                      | 6.5***<br>[3.7-9.2]    | 6.8***<br>[4.6-9.0] | 7.1***<br>[5.0-9.3]  | 11.4***<br>[9.5-13.2] | 11.6***<br>[10.2-12.9] | 14.0***<br>[11.9-16.1] |
| Culture of Patient Safety Average (6 items) §<br>(Physician IQR = 18.6% – 23.6%; RN IQR = 19.5% – 25.8%)         | 1.2<br>[1.6-4.0]       | 4.3***<br>[2.1-6.5] | 3.7**<br>[1.4-6.0]   | 9.7***<br>[6.9-12.5]  | 9.9***<br>[7.4-12.4]   | 11.9***<br>[8.5-15.3]  |

§ The 6 items in the summated Culture of Patient Safety Scale include 1) disagree patient safety is a priority, 2) agree that mistakes are held against staff, 3) agreed that important information is lost during shift changes, 4) disagree that they feel free to question authority, 5) disagree that feedback about changes are put into place based on event reports, and 6) disagree that they discuss ways to prevent errors from happening again.

**eTable 2. Sensitivity Analysis Comparing Nurse Coefficients from 53 vs 60 Study Hospitals using Ordinary Least Square Regression Models to Estimate the Differences in the Percentages of Clinicians with Various Outcomes (Burnout, Job Satisfaction, Intent to Leave) in Hospitals at the 75<sup>th</sup> vs. 25<sup>th</sup> Percentiles of Resources, Management and Patient Safety**

| IQR Change In -                                       | Number of Hospitals Used for Nurse Estimates |                       |                       |                        |                        |                        |
|-------------------------------------------------------|----------------------------------------------|-----------------------|-----------------------|------------------------|------------------------|------------------------|
|                                                       | Burnout                                      |                       | Job Dissatisfaction   |                        | Intention To Leave     |                        |
|                                                       | 53 Hospitals                                 | 60 Hospitals          | 53 Hospitals          | 60 Hospitals           | 53 Hospitals           | 60 Hospitals           |
| Not enough nurses to care for patients                | 11.7***<br>[9.1-14.4]                        | 12.2***<br>[9.7-14.8] | 11.8***<br>[9.6-14.0] | 12.2***<br>[10.0-14.4] | 15.5***<br>[12.6-18.4] | 15.6***<br>[12.8-18.4] |
| My control over my workload is poor or marginal       | 9.4***<br>[7.1-11.7]                         | 9.8***<br>[7.5-12.0]  | 10.1***<br>[8.4-11.8] | 10.3***<br>[8.6-12.1]  | 12.9***<br>[10.5-15.3] | 13.0***<br>[10.8-15.3] |
| Not confident management will act to resolve problems | 9.0***<br>[7.1-10.9]                         | 8.9***<br>[7.1-10.8]  | 9.1***<br>[7.5-10.5]  | 9.2***<br>[7.6-10.7]   | 10.7***<br>[8.4-13.1]  | 10.7***<br>[8.3-13.0]  |
| Work environment is poor or fair                      | 11.4***<br>[9.6-13.2]                        | 11.4***<br>[9.6-13.2] | 11.3***<br>[9.9-12.6] | 11.6***<br>[10.2-12.9] | 14.0***<br>[11.8-16.2] | 14.0***<br>[11.9-16.1] |
| Culture of Patient Safety Average (6 items) §         | 9.9***<br>[7.2-12.5]                         | 9.7***<br>[6.9-12.2]  | 10.2***<br>[8.0-12.3] | 9.9***<br>[7.4-12.4]   | 12.2***<br>[8.9-15.5]  | 11.9***<br>[8.5-15.3]  |

§ The 6 items in the summated Culture of Patient Safety Scale include 1) disagree patient safety is a priority, 2) agree that mistakes are held against staff, 3) agreed that important information is lost during shift changes, 4) disagree that they feel free to question authority, 5) disagree that feedback about changes are put into place based on event reports, and 6) disagree that they discuss ways to prevent errors from happening again.

**eTable 3. Characteristics of Magnet and Non-Magnet Hospitals**

| Hospital characteristics | Magnet Hospitals<br>CWS (N = 60) | Non-Magnet Hospitals<br>AHA (N = 4,429) |
|--------------------------|----------------------------------|-----------------------------------------|
| <b>Bed size, n (%)</b>   |                                  |                                         |
| ≤ 100                    | 2 (3.33)                         | 2,436 (55)                              |
| 101-250                  | 12 (20)                          | 1,086 (24.52)                           |
| 251-500                  | 17 (28.33)                       | 632 (14.27)                             |
| >500                     | 29 (48.33)                       | 275 (6.21)                              |
| <b>Ownership</b>         |                                  |                                         |
| Public                   | 9 (15)                           | 922 (20.82)                             |
| Non-profit               | 51 (85)                          | 2,700 (60.96)                           |
| For-profit               | 0 (0)                            | 614 (13.86)                             |
| Federal                  | 0 (0)                            | 193 (4.36)                              |
| <b>Location</b>          |                                  |                                         |
| Metro                    | 58 (96.67)                       | 2,616 (59.07)                           |
| Micro                    | 2 (3.33)                         | 758 (17.11)                             |
| Rural                    | 0 (0)                            | 1,055 (23.82)                           |
| <b>Region</b>            |                                  |                                         |
| New England              | 6 (10)                           | 164 (3.7)                               |
| Mid Atlantic             | 21 (35)                          | 348 (7.86)                              |
| South Atlantic           | 5 (8.33)                         | 666 (15.04)                             |
| East North Central       | 14 (23.33)                       | 678 (15.31)                             |
| East South Central       | 2 (3.33)                         | 364 (8.22)                              |
| West North Central       | 2 (3.33)                         | 655 (14.79)                             |
| West South Central       | 0 (0)                            | 636 (14.36)                             |
| Mountain                 | 2 (3.33)                         | 412 (9.3)                               |
| Pacific                  | 8 (13.33)                        | 506 (11.42)                             |
| <b>Teaching status</b>   |                                  |                                         |
| Non-teaching             | 17 (28.33)                       | 2,892 (65.3)                            |
| Minor teaching           | 21 (35)                          | 1,211 (27.34)                           |
| Major teaching           | 22 (36.67)                       | 326 (7.36)                              |

*Note.* Minor teaching is defined by ≤ 1:4 medical residents or fellows to beds; Major teaching is defined by >1:4 medical residents or fellows to beds; Micropolitan is defined by >10,000 & 450,000 residents. Omnibus chi-square values (with multiple degrees of freedom) indicate that all hospital characteristics differ significantly in Magnet and Non-Magnet hospitals.
