# Supplementary material for: Physician and Nurse Well-Being and Preferred Interventions to Address Burnout in Hospital Practice: Factors Associated With Turnover, Outcomes, and Patient Safety
Source: PubMed Central journal article supplement (PMC10329209; doi:10.1001/jamahealthforum.2023.1809), 2023-07-07
Supplement: jamahealthforum-e231809-s002.pdf [file jamahealthforum-e231809-s002.pdf]

| <b>*Group Name(s): US Clinician Wellbeing Study Consortium</b> |                   |                  |                         |                                                               |                                                 |                             |
|----------------------------------------------------------------|-------------------|------------------|-------------------------|---------------------------------------------------------------|-------------------------------------------------|-----------------------------|
| <b>*First Name and Midd</b>                                    | <b>*Last Name</b> | <b>*Suffix (</b> | <b>Academic Degrees</b> | <b>Institution</b>                                            | <b>Location (city, state/province, country)</b> | <b>Role or Contribution</b> |
| Meagan                                                         | Cleary            |                  | PhD, BSN, RN            | Advocate Christ Medical Center                                | Oak Lawn, IL/US                                 | Site PI                     |
| Cathaleen                                                      | Ley               |                  | PhD, RN                 | Anne Arundel Medical Center, Luminis Health                   | Annapolis, MD/US                                | Site PI                     |
| Carla J.                                                       | Borchardt         |                  | DNP, RN                 | Avera McKennan Hospital & University Health Center            | Sioux Falls, SD /US                             | Site PI                     |
| Jeannine M.                                                    | Brant             |                  | PhD, APRN               | Billings Clinic                                               | Billings, MT /US                                | Site PI                     |
| Barbra L                                                       | Turner            |                  | DNP, RN                 | Bon Secours Mercy Health/St. Elizabeth Youngstown Hospital    | Youngstown, OH /US                              | Site PI                     |
| Alyssa E.                                                      | Leimberger        |                  | MSN, RN                 | Bon Secours St. Mary's Hospital                               | Richmond, VA /US                                | Site PI                     |
| Kristin                                                        | Kozlowski         |                  | MSN, RN                 | Bristol Health                                                | Bristol, CT /US                                 | Site PI                     |
| Bernice L.                                                     | Coleman           |                  | PhD, RN                 | Cedars Sinai Medical Center                                   | Los Angeles, CA /US                             | Site PI                     |
| Nancy M.                                                       | Albert            |                  | PhD, RN                 | Cleveland Clinic Foundation                                   | Cleveland, Oh /US                               | Site PI                     |
| Caroline                                                       | Stewart           |                  | MSHI, RN                | El Camino Health                                              | Mountain View, CA /US                           | Site PI                     |
| Dinah                                                          | Steele            |                  | DNP, RN                 | Emory Saint Joseph's Hospital                                 | Atlanta, GA/US                                  | Site PI                     |
| Roberta                                                        | Kaplow            |                  | PhD, RN                 | Emory University Hospital                                     | Atlanta, GA /US                                 | Site PI                     |
| Kathleen                                                       | Kaminsky          |                  | MS, RN                  | Englewood Health                                              | Englewood, NJ /US                               | Site PI                     |
| Heidi A.                                                       | Hinkle            |                  | MSN, RN                 | Good Samaritan                                                | Vincennes, IN /US                               | Site PI                     |
| Rocel D.                                                       | Besa              |                  | PhD, RN                 | Hackensack Meridian/Jersey Shore University Medical Center    | Neptune, NJ /US                                 | Site PI                     |
| Kathleen P                                                     | Taylor            |                  | DNP, RN                 | Hackensack Meridian/Raritan Bay Medical Center                | Perth Amboy, NJ /US                             | Site PI                     |
| Kimberly                                                       | Dimino            |                  | DNP, RN                 | Hackensack Meridian/University Medical Center                 | Hackensack, NJ /US                              | Site PI                     |
| Cecelia                                                        | Cetnar            |                  | MA, BSN, RN             | Hackensack Meridian/Riverview Medical Center                  | Redbank, NJ /US                                 | Site PI                     |
| LS                                                             | Leach             |                  | PhD, RN                 | Huntington Health                                             | Pasadena, CA /US                                | Site PI                     |
| Sandra L.                                                      | Albritton         |                  | MN, BSN, RN             | Kootenai Hospital                                             | Coeur D Alene, ID /US                           | Site PI                     |
| Carolyn L.                                                     | Davidson          |                  | PhD, RN                 | Lehigh Valley Hospital                                        | Allentown, PA /US                               | Site PI                     |
| Timothy                                                        | Carrigan          |                  | PhD, RN                 | Loyola University Medical Center                              | Maywood, IL /US                                 | Site PI                     |
| Debra A.                                                       | Burke             |                  | DNP, MBA                | Massachusetts General Hospital                                | Boston, MA /US                                  | Site PI                     |
| Kristin R.                                                     | Anthony           |                  | MSN, RN                 | Mid Coast Hospital                                            | Brunswick, ME /US                               | Site PI                     |
| Mildred O.                                                     | Kowalski          |                  | PhD, RN                 | Morristown Medical Center                                     | Morristown, NJ /US                              | Site PI                     |
| Martha                                                         | Rounds            |                  | MS, APRN                | Newport Hospital                                              | Newport, RI /US                                 | Site PI                     |
| Jennifer M.                                                    | Tudor             |                  | MSN, RN                 | Northbay Healthcare                                           | Fairfield, CA/ US                               | Site PI                     |
| Leigh                                                          | Griffis           |                  | DNP, RN                 | Northwell Health/Huntington Hospital                          | Huntington, NY / US                             | Site PI                     |
| Linda M.                                                       | Vassallo          |                  | MSN, RN                 | Northwell Health/Long Island Jewish Medical Center            | New Hyde Park, NY / US                          | Site PI                     |
| Marie                                                          | Mulligan          |                  | PhD, RN                 | Northwell Health/Mather Hospital                              | Port Jefferson, NY / US                         | Site PI                     |
| Irene                                                          | Macyk             |                  | PhD, RN                 | Northwell Health/North Shore Medical Center                   | Manhasset, NY / US                              | Site PI                     |
| Catherine                                                      | Manley-Cullen     |                  | MS, RN                  | Northwell Health/Northern Westchester Hospital                | Mount Kisco, NY / US                            | Site PI                     |
| Sandra L.                                                      | Hutchinson        |                  | MSN, RN                 | Northwestern Medicine Delnor Hospital                         | Geneva, IL/ US                                  | Site PI                     |
| Amanda E.                                                      | Haberman          |                  | MSN, RN                 | Northwestern Medicine/Central DuPage Hospital                 | Winfield, IL / US                               | Site PI                     |
| Amy L.                                                         | Barnard           |                  | MS, APRN                | Northwestern Medicine/Lake Forest Hospital                    | Lake Forest, IL / US                            | Site PI                     |
| Barbara H.                                                     | Gobel             |                  | MS, RN                  | Northwestern Memorial Hospital                                | Chicago, IL / US                                | Site PI                     |
| Diana L.                                                       | McMahon           |                  | DNP, RN                 | Ohio State University Comprehensive Cancer Center - The James | Columbus, OH / US                               | Site PI                     |
| Megan J.                                                       | Brown             |                  | MSN, RN                 | OSF HealthCare Saint Anthony Medical Center                   | Rockford, IL / US                               | Site PI                     |
| Lisa                                                           | Strack            |                  | MSN, RN                 | OSF Healthcare St. Joseph Medical Center                      | Bloomington, IL / US                            | Site PI                     |
| Sheryl A.                                                      | Emmerling         |                  | PhD, RN                 | OSF HealthCare/Saint Francis Medical Center                   | Peoria, IL / US                                 | Site PI                     |
| Angela R.                                                      | Coladonato        |                  | DNP, RN                 | Penn Medicine/Chester County Hospital                         | West Chester, PA / US                           | Site PI                     |
| Jessie A.                                                      | Reich             |                  | PhD, RN                 | Penn Medicine/Hospital of the University of Pennsylvania      | Philadelphia, PA / US                           | Site PI                     |
| Justin J.                                                      | Gavaghan          |                  | BSN, RN                 | Penn Medicine/Lancaster General Hospital                      | Lancaster, PA / US                              | Site PI                     |
| James R.                                                       | Ballinghoff       |                  | DNP, MBA, RN            | Penn Medicine/Penn Presbyterian Medical Center                | Philadelphia, PA/ US                            | Site PI                     |
| Florence D.                                                    | Vanek             |                  | MSN, RN                 | Penn Medicine/Pennsylvania Hospital                           | Philadelphia, PA/ US                            | Site PI                     |

| *First Name and Midd | *Last Name | *Suffix ( Academic Degrees | Institution                                                                     | Location (city, state/province, country) | Role or Contribution |
|----------------------|------------|----------------------------|---------------------------------------------------------------------------------|------------------------------------------|----------------------|
| Karyn A.             | Book       |                            | DNP (c), RN<br>Penn Medicine/Princeton Health                                   | Plainsboro, NJ / US                      | Site PI              |
| Kathy                | Easter     |                            | MSN, RN<br>Robert Wood Johnson University Hospital                              | New Brunswick, NJ/ US                    | Site PI              |
| Pamela               | Duchene    |                            | PhD, APRN<br>Southwestern Vermont Health Care                                   | Bennington, VT/ US                       | Site PI              |
| Mary E.              | Lough      |                            | PhD, RN<br>Stanford Health Care                                                 | Stanford, CA / US                        | Site PI              |
| Christine L.         | Benson     |                            | MSN, RN<br>Summa Health System Akron Campus                                     | Akron, OH/ US                            | Site PI              |
| Maria                | Ducharme   |                            | DNP, RN<br>The Miriam Hospital                                                  | Providence, RI / US                      | Site PI              |
| Paul                 | Quinn      |                            | PhD, RN<br>The Valley Hospital                                                  | Ridgewood, NJ/ US                        | Site PI              |
| Donna M.             | Molyneaux  |                            | PhD, RN<br>Thomas Jefferson University Hospital and Gwynedd Mercy University, G | Philadelphia and Gwynedd Valley, PA / US | Site PI              |
| Lori                 | Kennedy    |                            | PhD, RN<br>UC Davis Health                                                      | Sacramento, CA / US                      | Site PI              |
| Elizabeth Ellen      | Nyheim     |                            | MSN, RN<br>UC San Diego Health                                                  | San Diego, CA / US                       | Site PI              |
| Donna M.             | Grochow    |                            | MSN, RN<br>UCI Health                                                           | Orange, CA / US                          | Site PI              |
| Shannon M.           | Purcell    |                            | DNP, RN<br>University of Alabama at Birmingham Hospital                         | Birmingham, AL/ US                       | Site PI              |
| Kirsten              | Hanrahan   |                            | DNP<br>University of Iowa Health Care                                           | Iowa City, IA/ US                        | Site PI              |
| Kathy B.             | Isaacs     |                            | PhD<br>UK HealthCare                                                            | Lexington, KY/ US                        | Site PI              |
| Jill J.              | Whade      |                            | MSN, RN<br>WakeMed Health and Hospitals                                         | Raleigh, NC/US                           | Site PI              |
