# Supplementary material for: Physician and Nurse Well-Being and Preferred Interventions to Address Burnout in Hospital Practice: Factors Associated With Turnover, Outcomes, and Patient Safety
Source: PubMed Central journal article supplement (PMC10329209; doi:10.1001/jamahealthforum.2023.1809), 2023-07-07
Supplement: jamahealthforum-e231809-s003.pdf [file jamahealthforum-e231809-s003.pdf]

## Data Sharing Statement

Aiken. Physician and Nurse Well-Being and Preferred Interventions to Address Burnout in Hospital Practice. *JAMA Health Forum*. Published July 07, 2023.

doi:10.1001/jamahealthforum.2023.1809

### Data

**Data available:** No
